# Supplementary material for: Monodisperse nonionic phytanyl ethylene oxide surfactants: high throughput lyotropic liquid crystalline phase determination and the formation of liposomes, hexosomes and cubosomes
Source: Royal Society of Chemistry journal article supplement (doi:10.1039/c0sm00454e), 2010-01-01
Supplement: c0sm00454e.pdf [file c0sm00454e.pdf]

## SUPPLEMENTARY MATERIAL

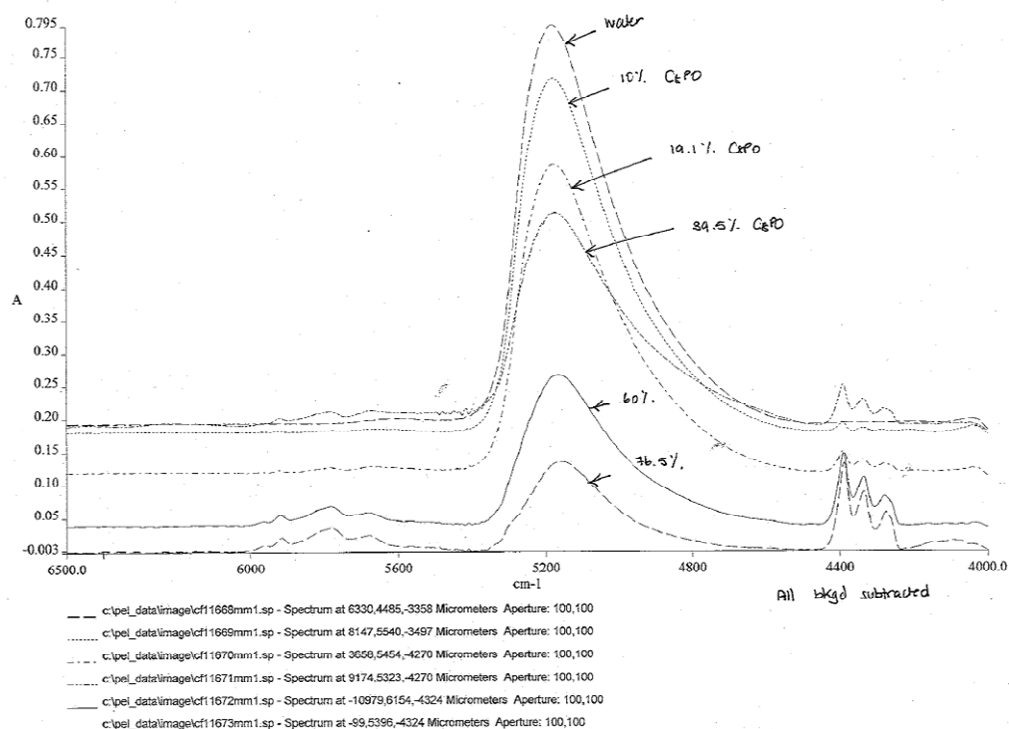

Figure S1: NIR spectra of the combination water band at  $\sim 5180 \text{ cm}^{-1}$  for C<sub>8</sub>PO with variable water contents 100, 90, 80.1, 60.5, 40 and 23.5 wt/wt% (top to bottom) performed at room temperature.

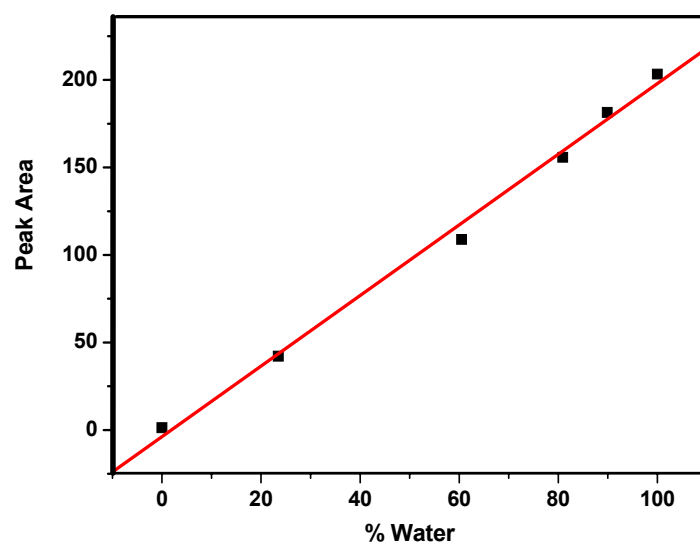

Figure S2: Representative calibration curve for DIT\_NIR Microspectroscopy performed at 20°C using octyldimethylphosphine oxide ( $C_8PO$ ). The calibration curves are linear with concentration demonstrating a Beer-Law dependency.

a

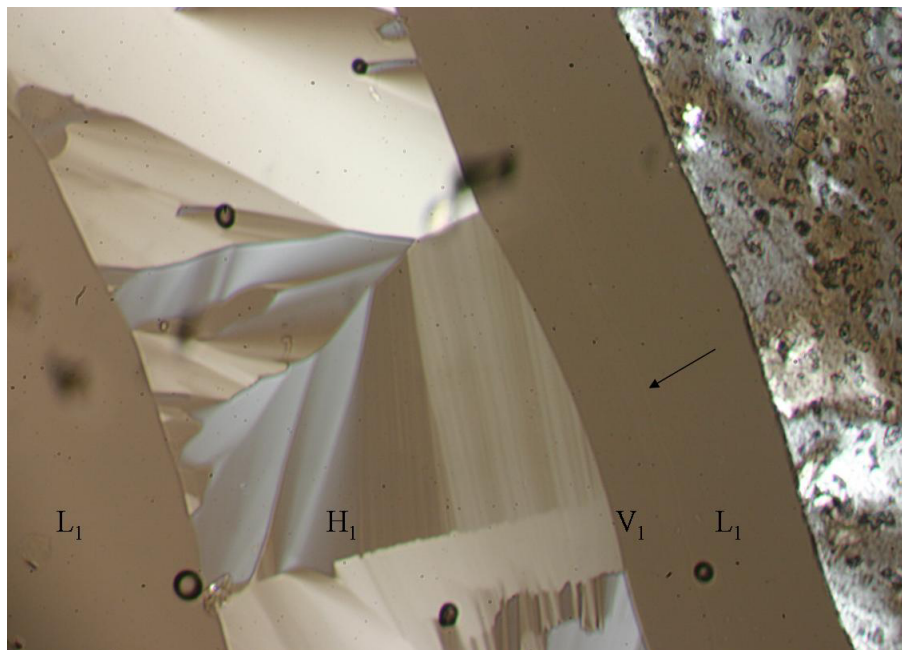

b

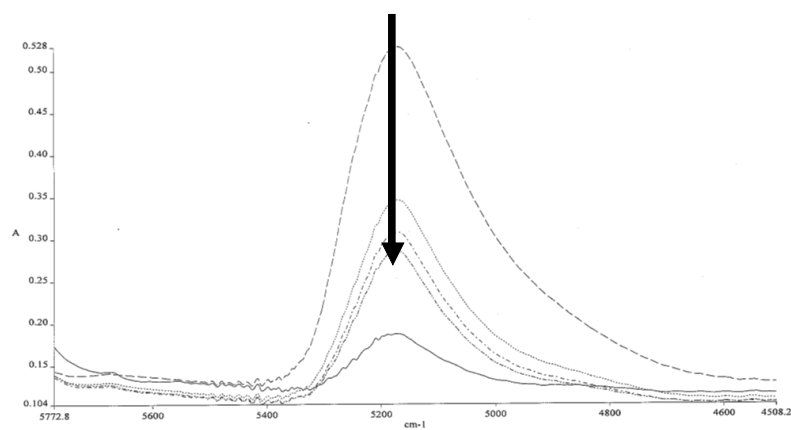

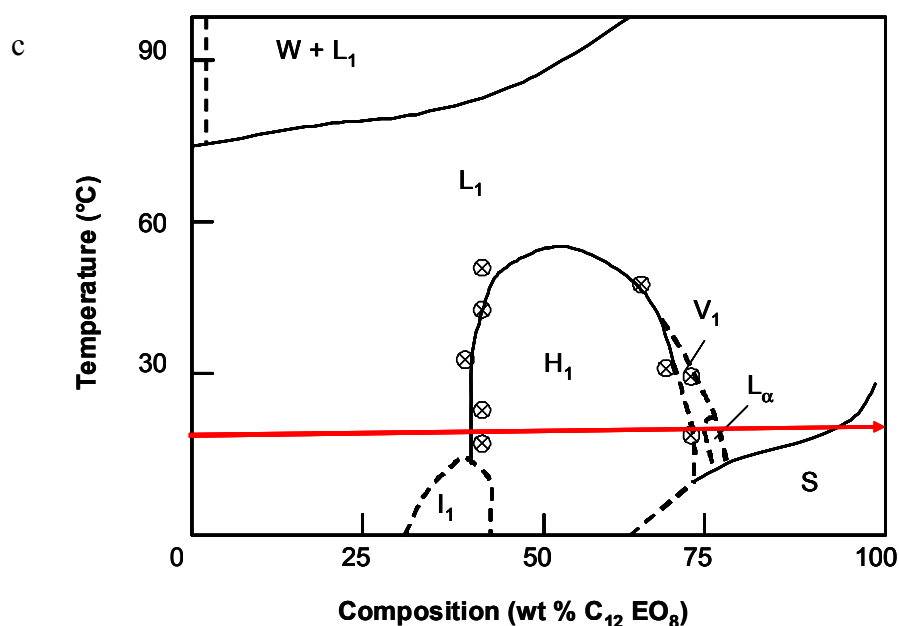

Figure S3: Validation of the DIT-NIR microspectroscopy method using  $C_{12}EO_8$  a) penetration scan (non-cross polarised  $\times 100$ ) showing the progression of phases at  $20^\circ\text{C}$ . The arrows indicated boundaries of bands with refractive index difference. b) NIR bend-stretch combination band at  $5200\text{ cm}^{-1}$  showing the decrease in water signal from left to right across the phase boundaries. c) phase diagram of  $C_{12}EO_8$  [re-drawn from Mitchell et. al {Mitchell , Tiddy, et al. 1983 #290}] with overlay of data collected from DIT-NIR showing reasonable correspondence.
